# Supplementary material for: Development and initial psychometric evaluation of the Body Image Matrix of Thinness and Muscularity – Female Bodies
Source: PubMed Central journal article supplement (PMC7709434; doi:10.1186/s40337-020-00345-w), 2020-12-01
Supplement: 40337_2020_345_MOESM1_ESM.pdf [file 40337_2020_345_MOESM1_ESM.pdf]

# Silhouetten-Matrix zur Erfassung von Schlankheit und Muskulosität bei Frauen\*

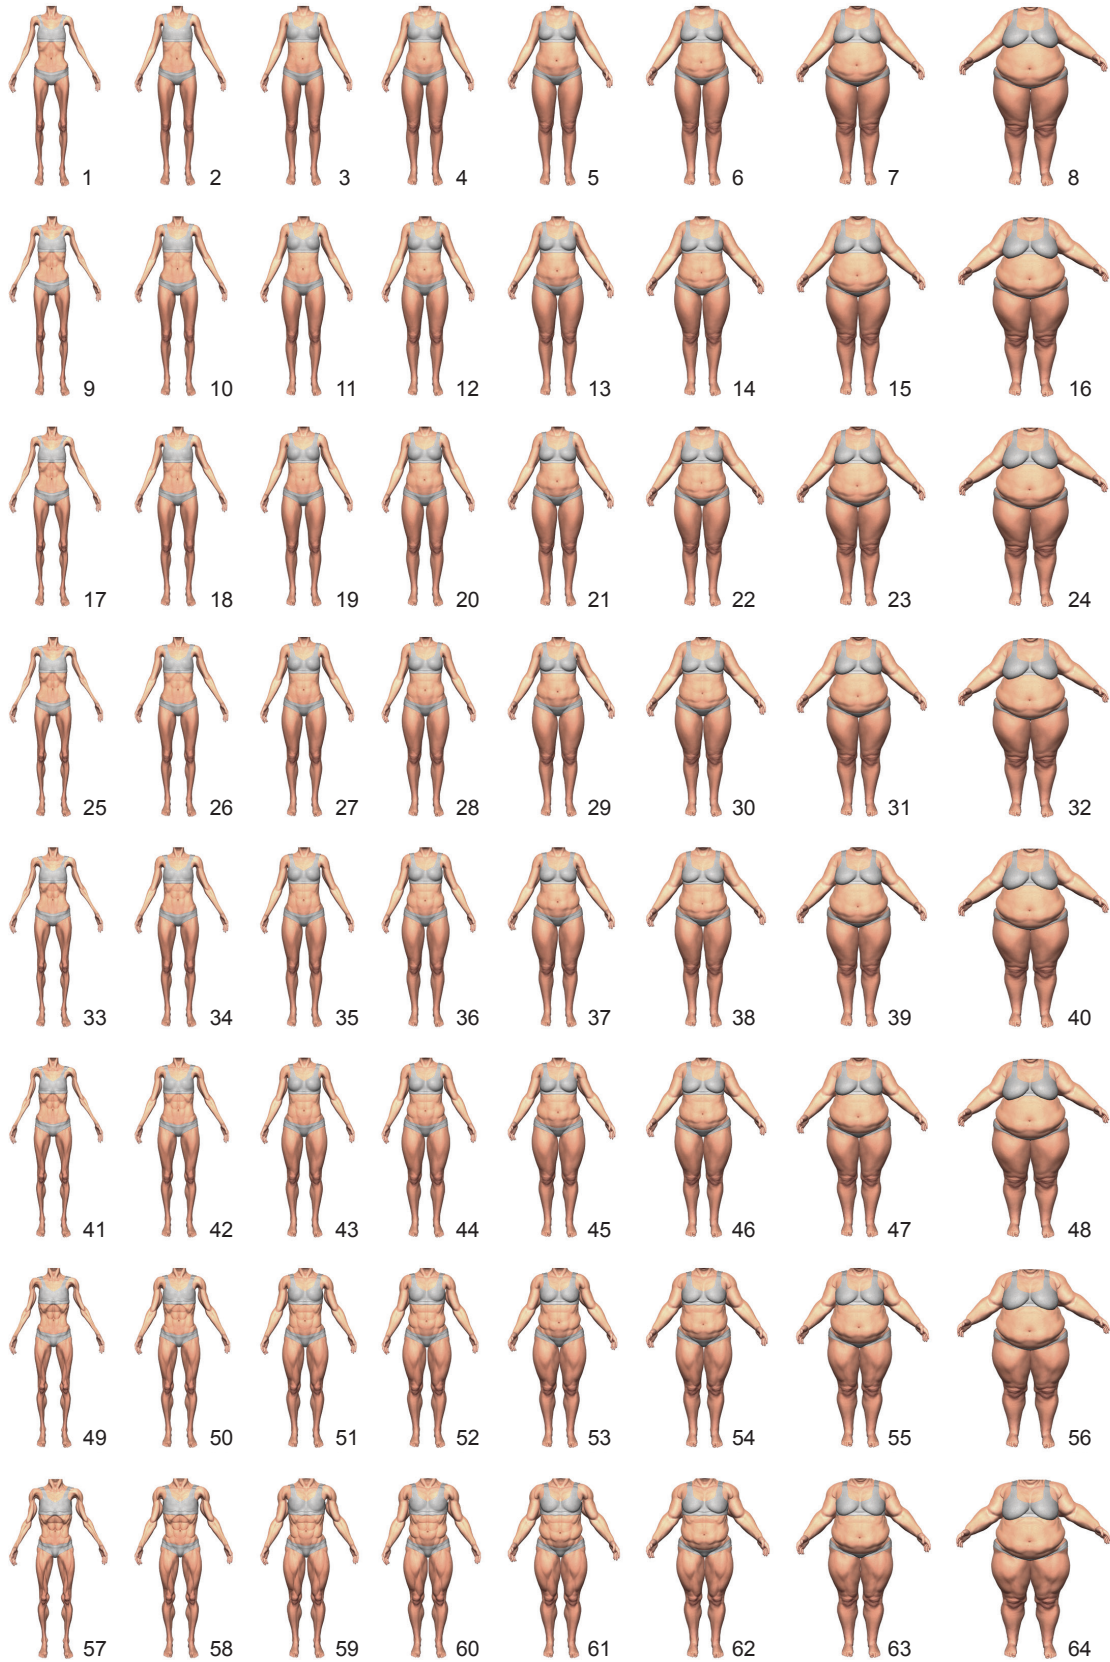

\*© Steinfeld, Hartmann, Waldorf und Vocks (2017, Mai) sowie Steinfeld, Hartmann, Waldorf und Vocks (in Vorb.).  
Abdruck erfolgt mit Genehmigung der Autoren.
